# Supplementary material for: Optimized Probe Masking for Comparative Transcriptomics of Closely Related Species
Source: PubMed Central journal article supplement (PMC3832635; doi:10.1371/journal.pone.0078497), 2013-11-08
Supplement: pone.0078497.s009.pdf [file pone.0078497.s009.pdf]

**Table S2.** Pearson, Spearman and Kendall correlation coefficients of the  $\Delta\mu$  expression values resulting from the three masking approaches and the naive approach, and the  $\Delta\Delta\text{Ct}$  expression values resulting from qRT-PCR of the genes of category A, B, C, and D (Methods Candidate selection). The 1mm and the 0mm approaches yield similar correlation coefficients, but larger ones than that for the gDNA and the naive approaches.

| category | mask  | Pearson | Spearman | Kendall |
|----------|-------|---------|----------|---------|
| A        | 1mm   | 0.980   | 0.961    | 0.853   |
|          | gDNA  | 0.929   | 0.902    | 0.758   |
|          | 0mm   | 0.978   | 0.950    | 0.853   |
|          | naive | 0.913   | 0.905    | 0.747   |
| B        | 1mm   | 0.961   | 0.956    | 0.827   |
|          | 0mm   | 0.952   | 0.939    | 0.818   |
|          | naive | 0.818   | 0.820    | 0.662   |
| C        | 1mm   | 0.938   | 0.931    | 0.797   |
|          | gDNA  | 0.867   | 0.898    | 0.717   |
|          | naive | 0.830   | 0.877    | 0.692   |
| D        | 1mm   | 0.920   | 0.920    | 0.774   |
|          | naive | 0.777   | 0.856    | 0.669   |
