# Supplementary material for: Optimized Probe Masking for Comparative Transcriptomics of Closely Related Species
Source: PubMed Central journal article supplement (PMC3832635; doi:10.1371/journal.pone.0078497), 2013-11-08
Supplement: pone.0078497.s010.pdf [file pone.0078497.s010.pdf]

**Table S3.** Primer sequences of the 40 candidate genes used for verification by qRT-PCR. The locus identifier for *A. thaliana* is given by the TAIR id and for *A. lyrata* by the Phytozome gene id.

| ae name   | locus At  | locus Al | forward primer             | reverse primer             |
|-----------|-----------|----------|----------------------------|----------------------------|
| 245245_at | AT1G44318 | 314128   | AACTGGGCACGGTGGGATCG       | CGCGCCTACACGACCATCCA       |
| 245336_at | AT4G16515 | 493225   | GCTGCCGCTCGTCGGTTAGG       | CGACCCACCCAACACTCGC        |
| 245369_at | AT4G15975 | 329916   | TAGCCGCTTCAACCGCACCG       | GGTTGCGGCGGAGAACGTGA       |
| 245397_at | AT4G14560 | 946923   | ACCGAGCTTCGTTTGGGATTACCTG  | GGAGGCCATCCCACGATTTGTGTT   |
| 245696_at | AT5G04190 | 939816   | GCTCGTCCATGGGCTCCACC       | CCGGCTCGGCGGTCATAACG       |
| 246270_at | AT4G36500 | 490986   | GGTGCTGGTGGTGTCCGACC       | CGGGTGGCTAAATTTGCTGTGG     |
| 246993_at | AT5G67450 | 496850   | ACGGAAGTAGCAGCAACAGCGT     | GGCCACCAATAGCACTTTCTCCGA   |
| 247215_at | AT5G64905 | 951330   | GGCGATTTTTTCGTCATCTCACAGCG | GTCTTGGTCTTCCCTCGCGCTT     |
| 247524_at | AT5G61440 | 496303   | ACGATGCAGCCTCGGGCCA        | TTCCCAACCGATGCCAAAGCC      |
| 248539_at | AT5G50130 | 495070   | GCCAGGGCGCAGCTACAACA       | TGGGTGCATAGCTTGAAAAGCCACA  |
| 248676_at | AT5G48850 | 494948   | ACCCACCAAGACCGCTCGCT       | TGTATACCGCCTCTGCCGACAAGT   |
| 248858_at | AT5G46630 | 948276   | CGAAGATGCCGGTGGCTGCT       | CGACGTCATCACGGTAGGTGCG     |
| 250937_at | AT5G03230 | 939701   | CGCACGAGTATTTAGCGCGGC      | TTCGCCGTTCCACCGATTCTTTC    |
| 251705_at | AT3G56400 | 486080   | GGGTGCAAGGCAACAAAGCAAGT    | TGCGTTGGTGTACACGTGTGGT     |
| 251910_at | AT3G53810 | 485775   | GGCCGGGACGGTTTTAGCGG       | ATCAAACATCACCTCCCACCGGAGA  |
| 252205_at | AT3G50350 | 485386   | CCGGGGGTAGTGCCTCGTCT       | GCTCTTCCACGGCGGCGAT        |
| 252626_at | AT3G44940 | 484892   | CGTCTCTGCTCAATGGCC         | AGTGGTGGGATGGTGACAGGAGG    |
| 253287_at | AT4G34270 | 491240   | GTGAAAAGTGTGGAGAGAAGCAA    | TCAACTGGATAACCTTTTCGCA     |
| 253400_at | AT4G32860 | 491410   | AGCGCCAACGCCAAGCGTAT       | ACGTCGGGAAACACTGCCGC       |
| 253908_at | AT4G27260 | 492072   | TGGATGGAAAACACGCCGATCCC    | AAGCGGGCTATGGACTTGTCACT    |
| 253959_at | AT4G26410 | 945436   | ACTGCTGTGATGCGACGGTG       | GAGCAGAGCCGATGGCCGAA       |
| 254175_at | AT4G24050 | 492457   | ACCGTCCCTCAAGCAGCA         | TTGGATCCGAGTCCAGACGGCG     |
| 254761_at | AT4G13195 | 333009   | ACTCACACTAGACGGAGTCGCAGT   | TGAGCTTCAGCTCCGAACCTCTCTCC |
| 255788_at | AT2G33310 | 482270   | ACCAAGCTACGAAATCTGCGAGGG   | ACCCAAGTGGCACTTTCCATTAC    |
| 256131_at | AT1G13600 | 920239   | GGGAATCTGCTCGTAGGTCA       | TCAGATACCGGTTTCAGCTT       |
| 257153_at | AT3G27220 | 936451   | GGGAGGCTTCATGTGATGGGTGG    | GCCCTGTGTGGTCCACCTCG       |
| 259407_at | AT1G13320 | 920212   | AGACAAGGTTCACTCAATCCGTG    | CATTCAGGACCAAACTCTTCAGC    |
| 260904_at | AT1G02450 | 470205   | TAGCGGCGGAGAAAAGATCCGGT    | GCGGCTTCAAATCCGTACGACACT   |
| 261766_at | AT1G15580 | 471758   | GGCCTCTCCGGAAGTGAGAGTAA    | AACCGGTGGCCAACCCACAA       |
| 261892_at | AT1G80840 | 477161   | AGGACCAGTCCGTGTTGGTTGC     | GCTGCTGCGGGTGTGAAGC        |
| 262085_at | AT1G56060 | 474673   | CGTATGTGACAGCTCCGCCACC     | AGCAGCAGCACATTGCAGCCA      |
| 263970_at | AT2G42850 | 346095   | AGGAGGGCGCTGAGAAGCCA       | TGGCCATGGCGTAAGAGGTTGTG    |
| 264867_at | AT1G24150 | 313260   | TCAGAGGGGAAGCGATGTGTGCT    | TCGAACTGCTGCTGCTACGGC      |
| 265256_at | AT2G28390 | 481666   | AACTCTATGCAGCATTTGATCCACT  | TGATTGCATATCTTTATCGCCATC   |
| 265452_at | AT2G46510 | 483808   | GGCGGTCCGGGGAGGTGTTA       | TCGTTCTGATTCCCGCAGATTTCCG  |
| 265806_at | AT2G18010 | 931672   | CCGTTTACGTGGGACCGAACCG     | CCTCGGCTAGTCGGAGCAACG      |
| 265856_at | AT2G42430 | 935111   | GCTGTGCTCACCATCGCCTACG     | GGCCGGCGATCTGTGCCTTC       |
| 266649_at | AT2G25810 | 932757   | CGCCATGGCCACCGACAGTT       | GTGACCGCGGGGTTGAGGTG       |
| 266820_at | AT2G44940 | 483623   | CGGCGAGCTTCTCGTCCAG        | GCTCGACTCGGCTCGGCTTC       |
| 266974_at | AT2G39370 | 482956   | CATGCGCTTCCGCTGC           | ACGATCTCCTATGGCTCCCGAAA    |

ae: array element, At: *Arabidopsis thaliana*, Al: *Arabidopsis lyrata*
