# Supplementary material for: Optimized Probe Masking for Comparative Transcriptomics of Closely Related Species
Source: PubMed Central journal article supplement (PMC3832635; doi:10.1371/journal.pone.0078497), 2013-11-08
Supplement: pone.0078497.s011.pdf [file pone.0078497.s011.pdf]

**Table S4.** Probe sets of the 40 candidate genes containing the position of the mismatch. A mismatch can occur at position 1 to 25. A “0” indicates that the probe matches perfectly without any mismatch and a “-” indicates that the probe is masked. Each of the 40 probe sets originally consists of 11 probes.

| ae name   | probes matching transcripts of At |   |   |   |    |   |   |   |   |    |    | probes matching transcripts of Al |    |    |    |    |    |    |    |    |    |    |
|-----------|-----------------------------------|---|---|---|----|---|---|---|---|----|----|-----------------------------------|----|----|----|----|----|----|----|----|----|----|
|           | 1                                 | 2 | 3 | 4 | 5  | 6 | 7 | 8 | 9 | 10 | 11 | 1                                 | 2  | 3  | 4  | 5  | 6  | 7  | 8  | 9  | 10 | 11 |
| 245245_at | 0                                 | 0 | 0 | - | -  | - | - | 0 | 0 | -  | 0  | 10                                | 9  | 0  | -  | -  | -  | -  | 24 | 0  | -  | 0  |
| 245696_at | 0                                 | - | 0 | - | 0  | - | 0 | 0 | 0 | -  | -  | 0                                 | -  | 0  | -  | 6  | -  | 0  | 0  | 3  | -  | -  |
| 246270_at | 0                                 | 0 | 0 | 0 | 0  | - | - | - | 0 | 0  | 0  | 25                                | 0  | 1  | 14 | 0  | -  | -  | -  | 9  | 10 | 0  |
| 248676_at | 0                                 | 0 | - | 0 | 0  | 0 | 0 | 0 | - | 0  | 0  | 0                                 | 0  | -  | 25 | 4  | 0  | 0  | 17 | -  | 8  | 0  |
| 251705_at | 0                                 | 0 | - | 0 | 0  | - | - | 0 | - | -  | 0  | 0                                 | 0  | -  | 22 | 0  | -  | -  | 1  | -  | -  | 0  |
| 252205_at | 0                                 | - | - | - | 0  | - | 0 | - | 0 | -  | 0  | 0                                 | -  | -  | -  | 0  | -  | 0  | -  | 0  | -  | 24 |
| 252626_at | -                                 | 0 | 0 | 0 | 0  | 0 | - | 0 | - | -  | -  | -                                 | 13 | 13 | 0  | 23 | 0  | -  | 0  | -  | -  | -  |
| 253287_at | 0                                 | 0 | 0 | 0 | 0  | 0 | 0 | 0 | - | 0  | 0  | 0                                 | 15 | 10 | 0  | 0  | 0  | 0  | 8  | -  | 0  | 0  |
| 253908_at | 0                                 | 0 | 0 | - | 0  | - | - | - | 0 | 0  | 0  | 8                                 | 0  | 9  | -  | 0  | -  | -  | -  | 0  | 6  | 14 |
| 254175_at | -                                 | - | - | 0 | 0  | 0 | 0 | 0 | 0 | -  | -  | -                                 | -  | -  | 0  | 0  | 0  | 4  | 0  | 0  | -  | -  |
| 255788_at | 0                                 | 0 | 0 | 0 | 0  | 0 | 0 | - | 0 | 0  | -  | 3                                 | 17 | 0  | 18 | 1  | 17 | 0  | -  | 0  | 0  | -  |
| 256131_at | 0                                 | - | - | 0 | 0  | 0 | - | 0 | 0 | 0  | 0  | 24                                | -  | -  | 22 | 0  | 20 | -  | 0  | 18 | 0  | 0  |
| 257153_at | 0                                 | 0 | - | - | 0  | 0 | 0 | 0 | 0 | -  | -  | 11                                | 15 | -  | -  | 0  | 0  | 0  | 12 | 0  | -  | -  |
| 259407_at | -                                 | 0 | 0 | 0 | 0  | 0 | 0 | - | 0 | 0  | 0  | -                                 | 0  | 0  | 0  | 0  | 0  | 0  | -  | 0  | 0  | 0  |
| 260904_at | -                                 | 0 | - | - | 0  | 0 | 0 | 0 | 0 | 0  | 0  | -                                 | 0  | -  | -  | 0  | 0  | 21 | 10 | 17 | 5  | 0  |
| 261892_at | -                                 | - | 0 | 0 | 0  | 0 | 0 | - | 0 | 0  | 0  | -                                 | -  | 0  | 0  | 0  | 0  | -  | 15 | 15 | 0  | 0  |
| 263970_at | 0                                 | 0 | 0 | 0 | 0  | 0 | 0 | - | 0 | -  | 0  | 0                                 | 14 | 0  | 0  | 0  | 0  | 25 | -  | 3  | -  | 9  |
| 264867_at | 0                                 | 0 | 0 | 0 | 0  | 0 | - | 0 | - | 0  | -  | 0                                 | 8  | 0  | 0  | 0  | 12 | -  | 12 | -  | 0  | -  |
| 265452_at | 0                                 | 0 | 0 | - | -  | 0 | 0 | - | - | -  | -  | 0                                 | 0  | 12 | -  | -  | 0  | 0  | -  | -  | -  | -  |
| 265856_at | 0                                 | 0 | 0 | - | -  | 0 | 0 | 0 | - | 0  | 0  | 0                                 | 0  | 0  | -  | -  | 0  | 15 | 0  | -  | 6  | 0  |
| 245336_at | -                                 | 0 | 0 | 0 | -  | - | 0 | - | - | 0  | 0  | -                                 | 17 | 3  | 20 | -  | -  | 23 | -  | -  | 1  | 8  |
| 245369_at | -                                 | 0 | - | - | 16 | - | - | - | - | 0  | -  | -                                 | 0  | -  | -  | 24 | -  | -  | -  | -  | 8  | -  |
| 245397_at | -                                 | 0 | - | - | -  | - | 0 | 0 | 0 | -  | -  | -                                 | 9  | -  | -  | -  | -  | 10 | 22 | 0  | -  | -  |
| 246993_at | 0                                 | - | - | - | 0  | 0 | - | - | - | -  | 0  | 0                                 | -  | -  | -  | 0  | 15 | -  | -  | -  | -  | 14 |
| 247524_at | -                                 | - | 0 | 0 | -  | - | 0 | 0 | - | -  | 0  | -                                 | -  | 0  | 16 | -  | -  | 0  | 23 | -  | -  | 19 |
| 248858_at | 0                                 | - | - | 0 | 0  | 0 | - | - | - | -  | -  | 8                                 | -  | -  | 0  | 12 | 0  | -  | -  | -  | -  | -  |
| 250937_at | 0                                 | 0 | - | - | 0  | 0 | 0 | - | - | -  | 0  | 7                                 | 0  | -  | -  | 25 | 11 | 0  | -  | -  | -  | 19 |
| 251910_at | -                                 | 0 | - | - | -  | 0 | - | - | - | 0  | -  | -                                 | 5  | -  | -  | -  | 0  | -  | -  | -  | 0  | -  |
| 253400_at | -                                 | - | 0 | 0 | -  | 0 | 0 | 0 | - | -  | 0  | -                                 | -  | 21 | 22 | -  | 0  | 10 | 0  | -  | -  | 5  |
| 253959_at | 0                                 | 0 | 0 | 0 | -  | - | - | - | 0 | 0  | -  | 13                                | 0  | 22 | 9  | -  | -  | -  | -  | 0  | 17 | -  |
| 261766_at | -                                 | - | 0 | - | -  | 0 | - | 0 | 0 | 0  | -  | -                                 | -  | 21 | -  | -  | 0  | -  | 15 | 11 | 18 | -  |
| 262085_at | -                                 | - | - | 0 | -  | - | - | - | 0 | 0  | 0  | -                                 | -  | -  | 7  | -  | -  | -  | -  | 2  | 0  | 0  |
| 265256_at | -                                 | - | - | - | 0  | - | 0 | 0 | 0 | 0  | 0  | -                                 | -  | -  | -  | 11 | -  | 6  | 7  | 23 | 0  | 0  |
| 266649_at | 0                                 | 0 | - | 0 | 0  | - | - | - | - | 0  | -  | 18                                | 16 | -  | 0  | 24 | -  | -  | -  | -  | 9  | -  |
| 266820_at | 0                                 | - | 0 | - | 0  | 0 | 0 | - | 0 | 0  | -  | 19                                | -  | 0  | -  | 17 | 23 | 22 | -  | 17 | 22 | -  |
| 266974_at | -                                 | - | 0 | 0 | -  | 0 | - | 0 | 0 | 0  | 0  | -                                 | -  | 13 | 13 | -  | 14 | -  | 20 | 0  | 7  | 4  |
| 254761_at | -                                 | - | 0 | - | -  | - | - | 0 | - | -  | 0  | -                                 | -  | 0  | -  | -  | -  | -  | 10 | -  | -  | 0  |
| 265806_at | 0                                 | 0 | 0 | 0 | -  | - | - | 0 | 0 | 0  | -  | 14                                | 18 | 1  | 25 | -  | -  | -  | 9  | 0  | 0  | -  |
| 247215_at | -                                 | - | 0 | 0 | 0  | - | - | - | - | -  | -  | -                                 | -  | 0  | 0  | 0  | -  | -  | -  | -  | -  | -  |
| 248539_at | -                                 | - | 0 | 0 | -  | - | 0 | 0 | - | -  | -  | -                                 | -  | 0  | 7  | -  | -  | 0  | 0  | -  | -  | -  |

ae: array element, At: *Arabidopsis thaliana*, Al: *Arabidopsis lyrata*
